# Supplementary material
Source: PubMed Central journal article supplement (PMC5780648)
Supplement: NIHMS935227-supplement-supplement_1.pdf [file NIHMS935227-supplement-supplement_1.pdf]

## Supplementary Tables

**Supplement Table 1. Variables predicting cardiac response among AL patients achieving nFLCr (n=173)**

| Variable                                  | HR (95% CI)       | P      |
|-------------------------------------------|-------------------|--------|
| <b>Univariable analysis</b>               |                   |        |
| Male gender                               | 1.15 (0.78-1.73)  | 0.47   |
| Differential FLC > 18.0 at diagnosis      | 1.56 (1.07-2.27)  | 0.022* |
| Age at diagnosis > 60                     | 0.93 (0.69-1.35)  | 0.69   |
| Non IgG heavy chain                       | 0.70 (0.38-1.19)  | 0.20   |
| t(11;14) IGH/CCND1 fusion FISH            | 1.17 (0.72-1.92)  | 0.52   |
| -13 chromosome FISH                       | 1.65 (0.97 -2.72) | 0.06   |
| Hyperdiploidy FISH                        | 0.93 (0.47-1.67)  | 0.81   |
| iFLC lambda                               | 1.30 (0.82-2.10)  | 0.29   |
| <i>Primary treatment</i>                  |                   |        |
| autologous HCT                            | 1.27 (0.88-1.86)  | 0.20   |
| melphalan and dexamethasone               | 0.62 (0.41-0.93)  | 0.020* |
| proteasome inhibitor inclusive            | 1.47 (0.85-2.42)  | 0.16   |
| Time from treatment to nFLCr <3.8 months  | 1.12 (0.76-1.62)  | 0.57   |
| Time from diagnosis to nFLCr < 7.6 months | 0.92 (0.63-1.33)  | 0.65   |
| <b>Multivariable analysis</b>             |                   |        |
| -13 chromosome FISH                       | 1.17 (0.67-2.00)  | 0.57   |
| iFLC lambda                               | 0.99 (0.52-2.10)  | 0.98   |
| Primary treatment mel/dex                 | 0.49 (0.27-0.86)  | 0.012* |
| Differential FLC > 18.0 at diagnosis      | 2.09 (1.23-3.54)  | 0.006* |

\* indicates  $p < 0.05$

**Supplement Table 2. Variables predicting renal response among AL patients achieving nFLCr (n=240)**

| <b>Variable</b>                           | <b>HR (95% CI)</b> | <b>P</b> |
|-------------------------------------------|--------------------|----------|
| <b>Univariable analysis</b>               |                    |          |
| Male gender                               | 0.84 (0.61-1.16)   | 0.29     |
| Differential FLC > 18.0 at diagnosis      | 1.21 (0.84-1.72)   | 0.29     |
| Age at diagnosis > 60                     | 1.05 (0.77-1.44)   | 0.76     |
| Non IgG heavy chain                       | 0.91 (0.72-1.76)   | 0.66     |
| t(11;14) IGH/CCND1 fusion FISH            | 1.04 (0.63-1.48)   | 0.87     |
| -13 chromosome FISH                       | 1.58 (1.00-2.44)   | 0.048*   |
| Hyperdiploidy FISH                        | 0.92 (0.50-1.56)   | 0.76     |
| iFLC lambda                               | 0.59 (0.42-0.83)   | 0.003*   |
| <i>Primary treatment</i>                  |                    |          |
| autologous HCT                            | 1.04 (0.76-1.44)   | 0.80     |
| melphalan and dexamethasone               | 0.88 (0.60-1.24)   | 0.47     |
| proteasome inhibitor inclusive            | 0.81 (0.49-1.36)   | 0.45     |
| Time from treatment to nFLCr <3.8 months  | 1.09 (0.80-1.50)   | 0.58     |
| Time from diagnosis to nFLCr < 7.6 months | 1.10 (0.80-1.51)   | 0.55     |
| 24 hour urine protein < 5.5 g/dL          | 1.48 (1.08-2.03)   | 0.016*   |
| <b>Multivariable analysis</b>             |                    |          |
| -13 chromosome FISH                       | 1.59 (0.99-2.51)   | 0.055    |
| iFLC lambda                               | 0.55 (0.34-0.90)   | 0.018*   |
| 24 hour urine protein < 5.5 g/dL          | 1.65 (1.06-2.57)   | 0.028*   |
| Differential FLC > 18.0 at diagnosis      | 1.14 (0.66-1.88)   | 0.63     |

\* indicates  $p < 0.05$
